# Supplementary material for: Computational study of novel natural inhibitors targeting aminopeptidase N(CD13)
Source: Aging (Albany NY). 2020 May 9;12(9):8523–35. doi: 10.18632/aging.103155 (PMC7244087; doi:10.18632/aging.103155)
Supplement: Supplementary Table 1 [file aging-12-103155-s001..xls]

## Sheet: Sheet1
Supplementary Table 1. 318 compounds with higher LibDock scores than Bestatin.
ZINC000006094124	127.999
ZINC000014820552	125.435
ZINC000006092198	125.32
ZINC000018185774	125.143
ZINC000000899884	125.018
ZINC000018185774	124.894
ZINC000014820405	123.912
ZINC000020470300	122.885
ZINC000005732375	122.783
ZINC000028465419	122.38
ZINC000005732375	122.275
ZINC000006092239	122.243
ZINC000003871576	121.97
ZINC000013481874	121.889
ZINC000003871576	121.855
ZINC000000155807	121.659
ZINC000014820583	121.366
ZINC000005732375	120.855
ZINC000000895551	120.767
ZINC000018169010	120.704
ZINC000002585551	120.314
ZINC000000155807	119.809
ZINC000002585551	119.717
ZINC000003871576	119.52
ZINC000000518798	119.101
ZINC000003136351	118.759
ZINC000002585551	118.242
ZINC000000518798	117.851
ZINC000014727929	117.552
ZINC000000338284	117.195
ZINC000000338284	116.839
ZINC000018847051	115.653
ZINC000017176122	115.621
ZINC000006018743	115.355
ZINC000004654623	115.269
ZINC000000968074	114.757
ZINC000014727929	114.631
ZINC000012428336	114.543
ZINC000002048856	114.368
ZINC000013517387	114.346
ZINC000000517458	114.331
ZINC000000968074	113.867
ZINC000018136415	113.851
ZINC000000517458	113.85
ZINC000000517458	113.81
ZINC000000056583	113.759
ZINC000000001219	113.29
ZINC000014726530	113.279
ZINC000000156701	113.133
ZINC000001568212	112.448
ZINC000012153769	112.334
ZINC000000225574	112.165
ZINC000018275062	111.849
ZINC000006094144	111.84
ZINC000001721693	111.632
ZINC000001721693	111.628
ZINC000018136415	111.527
ZINC000014761282	111.215
ZINC000014690904	111.164
ZINC000004098319	111.058
ZINC000000388657	110.977
ZINC000001529249	110.753
ZINC000002031813	110.694
ZINC000014820415	110.551
ZINC000005732370	110.526
ZINC000000000857	110.402
ZINC000001582158	110.288
ZINC000002145015	110.235
ZINC000000000857	110.127
ZINC000014727931	110.124
ZINC000001664037	109.926
ZINC000004096880	109.882
ZINC000000899884	109.844
ZINC000014727929	109.755
ZINC000000985403	109.74
ZINC000017129255	109.577
ZINC000001664037	109.401
ZINC000000119983	109.33
ZINC000014821963	109.276
ZINC000002031813	109.252
ZINC000000005608	109.244
ZINC000001568212	109.195
ZINC000001532046	109.042
ZINC000002145015	108.999
ZINC000014727931	108.988
ZINC000003978494	108.85
ZINC000000898237	108.573
ZINC000005115873	108.418
ZINC000000896120	108.34
ZINC000000899567	108.337
ZINC000002048856	108.119
ZINC000018123143	108.011
ZINC000005640448	107.943
ZINC000000899920	107.872
ZINC000002565773	107.863
ZINC000002154251	107.855
ZINC000000001219	107.831
ZINC000014727929	107.79
ZINC000000896120	107.679
ZINC000000005608	107.219
ZINC000000896120	107.198
ZINC000002565773	107.094
ZINC000000057676	107.092
ZINC000014445228	107.046
ZINC000001689533	106.924
ZINC000000391894	106.857
ZINC000000039111	106.766
ZINC000004098343	106.756
ZINC000014768312	106.755
ZINC000005934541	106.715
ZINC000000338222	106.623
ZINC000014820415	106.56
ZINC000014727929	106.417
ZINC000004098527	106.399
ZINC000005998558	106.204
ZINC000095617867	106.176
ZINC000000056584	106.03
ZINC000001721694	105.841
ZINC000004098623	105.793
ZINC000006524916	105.753
ZINC000018804836	105.726
ZINC000000388659	105.677
ZINC000014820400	105.566
ZINC000000896041	105.516
ZINC000004098600	105.371
ZINC000000001937	105.315
ZINC000000058119	105.231
ZINC000001850101	105.202
ZINC000004098319	105.171
ZINC000001620282	105.139
ZINC000014815122	105.07
ZINC000000094256	104.879
ZINC000002565773	104.874
ZINC000000402696	104.868
ZINC000000477938	104.754
ZINC000002154253	104.669
ZINC000001620282	104.626
ZINC000001640621	104.608
ZINC000000094256	104.391
ZINC000000518798	104.3
ZINC000031500048	104.277
ZINC000018847037	104.086
ZINC000014806381	104.055
ZINC000001721693	103.995
ZINC000000066104	103.92
ZINC000002109870	103.919
ZINC000004175523	103.876
ZINC000004175523	103.854
ZINC000000057060	103.796
ZINC000004175523	103.675
ZINC000018136415	103.662
ZINC000014445238	103.578
ZINC000039350454	103.57
ZINC000039350454	103.546
ZINC000000225574	103.543
ZINC000039350454	103.516
ZINC000013374377	103.423
ZINC000000073693	103.419
ZINC000003641060	103.377
ZINC000006092566	103.331
ZINC000001850101	103.29
ZINC000095617488	103.237
ZINC000014684940	103.156
ZINC000014435203	103.125
ZINC000000038933	103.067
ZINC000000057344	103.039
ZINC000006458015	103.035
ZINC000017176123	102.823
ZINC000039350454	102.793
ZINC000000057344	102.764
ZINC000000897928	102.661
ZINC000000057344	102.647
ZINC000095617488	102.644
ZINC000003871633	102.526
ZINC000001850101	102.473
ZINC000000038933	102.447
ZINC000000388661	102.422
ZINC000001627642	102.393
ZINC000003978494	102.299
ZINC000000897928	102.268
ZINC000000898006	102.258
ZINC000004492895	102.256
ZINC000000388079	102.207
ZINC000031164702	102.2
ZINC000017993401	102.141
ZINC000001850101	102.111
ZINC000000899157	102.103
ZINC000003978494	101.927
ZINC000000388661	101.914
ZINC000018804836	101.873
ZINC000014806341	101.813
ZINC000000001219	101.757
ZINC000014820417	101.739
ZINC000014445238	101.726
ZINC000014761282	101.725
ZINC000013377095	101.641
ZINC000014806341	101.621
ZINC000014764385	101.602
ZINC000000898220	101.6
ZINC000013322244	101.573
ZINC000006484607	101.517
ZINC000006524916	101.508
ZINC000003641060	101.481
ZINC000000018056	101.48
ZINC000005998558	101.455
ZINC000001651170	101.452
ZINC000013359969	101.446
ZINC000013340870	101.435
ZINC000014766024	101.33
ZINC000000388661	101.308
ZINC000014489321	101.302
ZINC000000057689	101.25
ZINC000006524916	101.241
ZINC000004098238	101.199
ZINC000001995170	101.079
ZINC000013341109	101.059
ZINC000001689527	101.01
ZINC000017129257	100.962
ZINC000000057920	100.928
ZINC000000900861	100.926
ZINC000006092269	100.758
ZINC000000898006	100.749
ZINC000002565773	100.669
ZINC000013359969	100.665
ZINC000004095812	100.659
ZINC000014503848	100.59
ZINC000000403155	100.535
ZINC000000985403	100.531
ZINC000014503848	100.517
ZINC000014503848	100.515
ZINC000003594418	100.481
ZINC000000403155	100.48
ZINC000001721693	100.463
ZINC000014727931	100.455
ZINC000000057674	100.421
ZINC000003871176	100.357
ZINC000017993401	100.353
ZINC000053098690	100.288
ZINC000003871176	100.187
ZINC000004098319	100.167
ZINC000003881372	100.153
ZINC000014503848	100.143
ZINC000004654623	100.129
ZINC000000066104	100.126
ZINC000005765166	100.126
ZINC000000898959	100.117
ZINC000006093689	100.116
ZINC000013377095	100.103
ZINC000000518644	100.099
ZINC000006092566	100.086
ZINC000018825330	100.025
ZINC000005732370	100.012
ZINC000003978525	99.9595
ZINC000014820468	99.9394
ZINC000000001651	99.9185
ZINC000000265747	99.8566
ZINC000006091886	99.8234
ZINC000029566455	99.7731
ZINC000014807483	99.7561
ZINC000000403038	99.6854
ZINC000000006787	99.5221
ZINC000000057291	99.5098
ZINC000012446789	99.5068
ZINC000018847036	99.4731
ZINC000005998754	99.441
ZINC000005732368	99.3741
ZINC000000086978	99.3362
ZINC000013340660	99.3082
ZINC000018169811	99.3078
ZINC000003979039	99.2347
ZINC000004097652	99.2244
ZINC000001618130	99.2028
ZINC000006093351	99.1236
ZINC000028642532	99.1163
ZINC000000518797	99.1069
ZINC000000014036	99.0254
ZINC000000897736	98.9832
ZINC000014491514	98.9314
ZINC000001628334	98.8496
ZINC000031500058	98.8146
ZINC000001089845	98.7419
ZINC000031500056	98.7386
ZINC000016051887	98.7222
ZINC000000000076	98.6852
ZINC000003641069	98.6631
ZINC000019701796	98.6265
ZINC000001704714	98.625
ZINC000014651635	98.6053
ZINC000000898179	98.5648
ZINC000000015095	98.4806
ZINC000000899550	98.4802
ZINC000003871633	98.4727
ZINC000031500056	98.4665
ZINC000001557677	98.4214
ZINC000000338222	98.3649
ZINC000014814969	98.3415
ZINC000000043479	98.2962
ZINC000001700946	98.2599
ZINC000000001601	98.0914
ZINC000014489316	98.064
ZINC000000057291	98.0065
ZINC000035464254	97.9829
ZINC000013379107	97.9481
ZINC000000001551	97.8019
ZINC000006018563	97.7185
ZINC000000896042	97.7154
ZINC000002518378	97.6904
ZINC000000001021	97.6769
ZINC000000061642	97.6658
ZINC000019861870	97.6197
ZINC000014496278	97.5749
ZINC000000057751	97.5401
ZINC000018847046	97.5389
ZINC000015120480	97.5114
ZINC000013340360	97.4083
ZINC000006116596	97.3924
ZINC000013377483	97.3515
ZINC000000006556	97.2663
ZINC000001532730(Bestatin)	97.2164
